# Supplementary material
Source: PubMed Central journal article supplement (PMC2801777)

23  
24  
25 **Supplemental Fig. 1- Distribution of Mass Errors and Estimation of Statistical**  
26 **Mass Accuracy.** At each time point, the calibrated mass errors (ppm) for all the  
27 peptides identified from the mitochondrial fractions by Mascot were obtained from the  
28 MSQUANT peptide report. Mass errors were binned to a width of 2 ppm and the  
29 number of peptides per bin counted. Data shows the Gaussian nature of the distribution  
30 of mass deviations and the average dispersion was  $1.97 \pm 0.19$  ppm.  
31

32  
33 **Supplemental Fig. 2- Hyperglycemia Increased Prohibitin 1.** SCs were incubated  
34 with 5.5 mM (K0) or 30 mM (K6) glucose for 6 days. **(A)** Spectra show MS1 scan  
35 indicating a 1.6 fold increase for the prohibitin peptide AATFGLILDDVSLTHLTFGK.  
36 **(B)** The expression of prohibitin 1 from a heavy mitochondrial fraction obtained from  
37 SCs subjected to hyperglycemia for the indicated time.  $\beta$ -Actin was used as a loading  
38 control.  
39  
40  
41  
42  
43  
44  
45  
46  
47  
48  
49  
50  
51  
52  
53  
54  
55  
56  
57  
58  
59  
60

## Supplemental Fig. 1

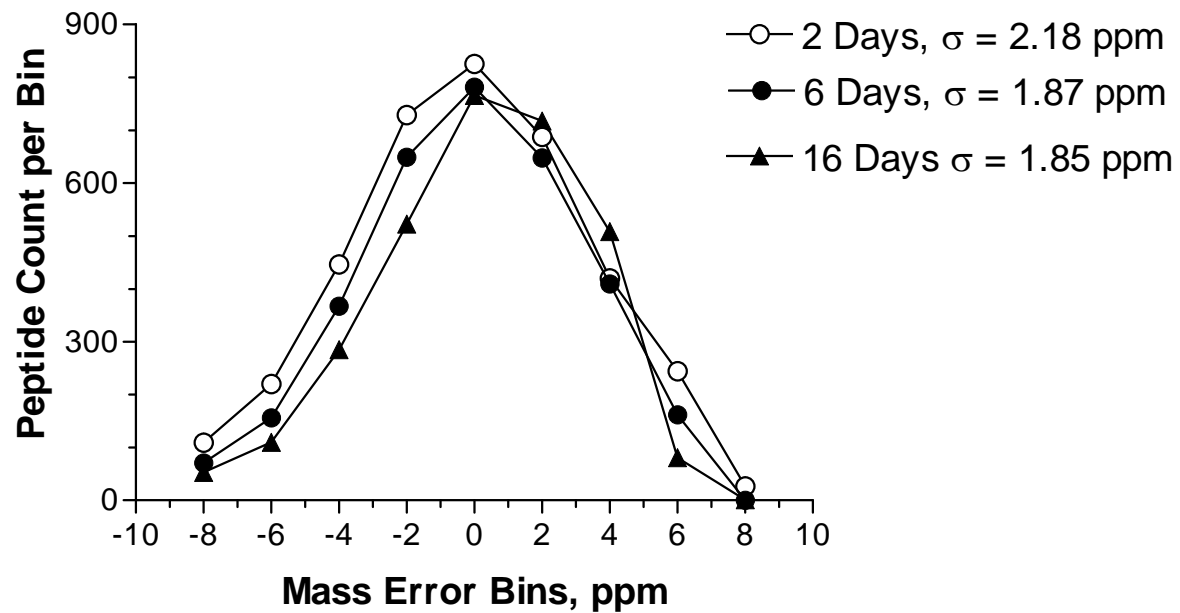

## Supplemental Fig. S2

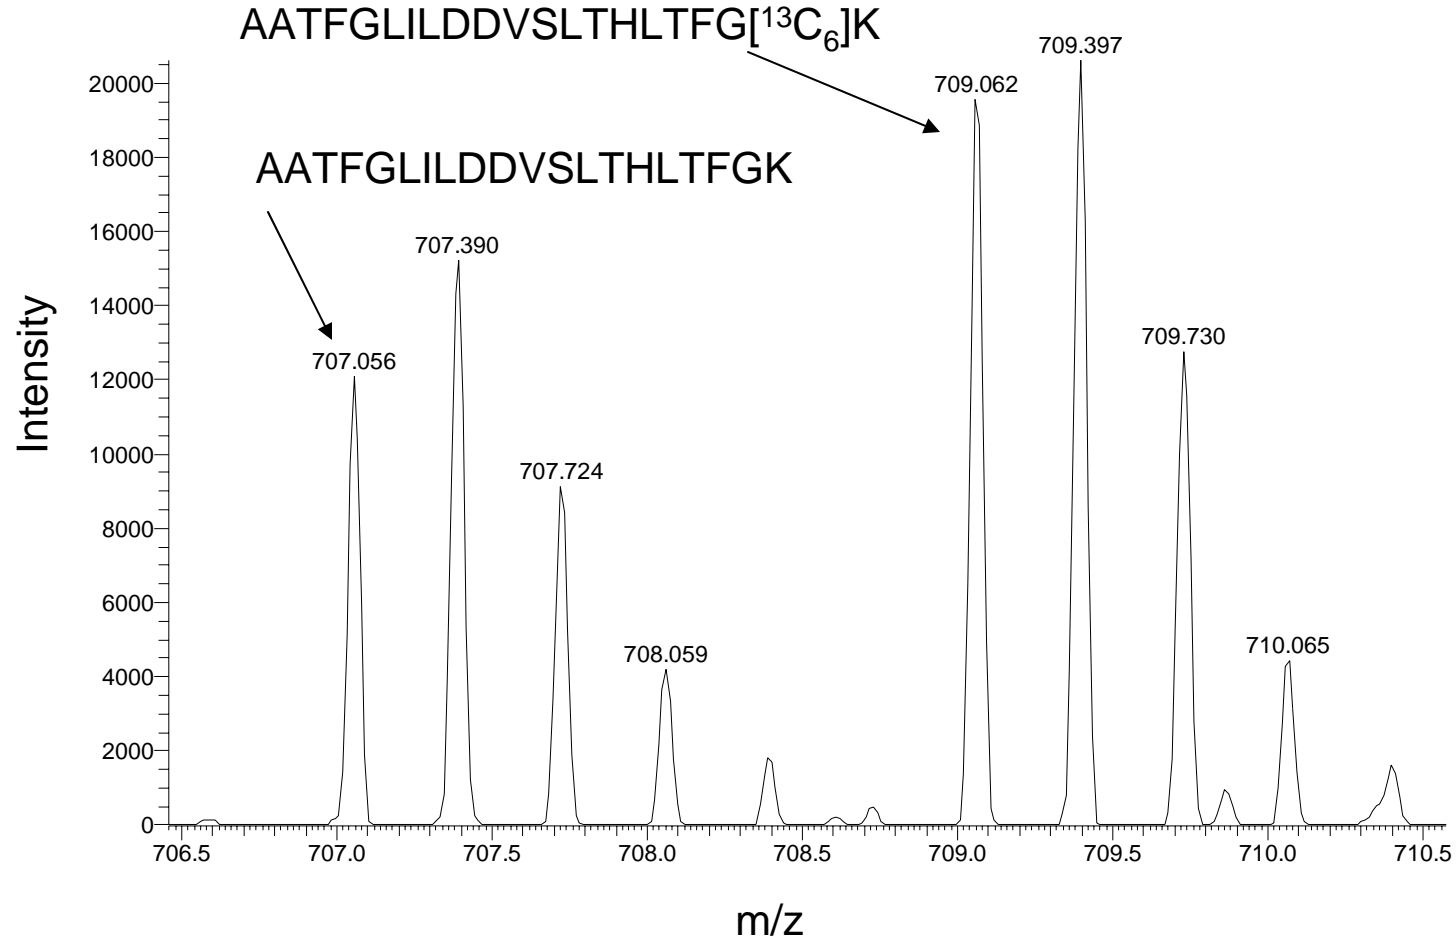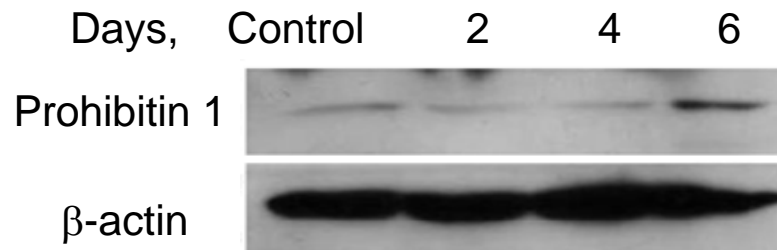

Supplement: NIHMS160018-supplement-01.pdf [file NIHMS160018-supplement-01.pdf]
